# Supplementary material
Source: HighWire-hosted journal article supplement (http://www.annfammed.org/highwire/filestream/634/field_highwire_adjunct_files/0/De_Marchis_Supp_Apps.pdf)
Supplement: De_Marchis_Supp_Apps.pdf [file De_Marchis_Supp_Apps.pdf]

Supplemental materials for:

De Marchis E, Torres J, Benesch T, et al. Interventions addressing food insecurity in health care settings: a systematic review. *Ann Fam Med.* 2019;17(5):436-447.

### Supplemental Appendix 1: Search term details

We searched PubMed, EMBASE, Web of Science (WoS), and clinicaltrials.gov, for studies describing health care-based interventions published from January 1, 2000 through September 1, 2018. The search strategy was developed and refined by two study team members (E.H.D., J.M.T.), in consultation with an experienced medical research librarian (E.M.W.). The resulting two-concept search strategy was adapted to work in each database searched. Appendix Table 1 includes the complete search strategy for PubMed; an equivalent search was run in EMBASE and WoS. Clinicaltrials.gov was searched only for trials including the phrase “food insecurity” to search for ongoing food insecurity-specific clinical trials. Food insecurity (concept 1) was defined as the limited access to sufficient food due to financial or other resource lacks. We added terms related to food-related stress and social determinants of health to be comprehensive. Intervention terms (concept 2) were used to focus on interventions and exclude articles focused only on social risk screening. Concepts were linked using the term “AND.” MeSH/Emtree vocabulary terms were not used in the search as they did not match with either concept.

| <b>Supplemental Table 1. Systematic Review Search Terms: Complete PubMed Search Strategy</b> |                                                                                                                                                                                                                                                                                                                                                             |
|----------------------------------------------------------------------------------------------|-------------------------------------------------------------------------------------------------------------------------------------------------------------------------------------------------------------------------------------------------------------------------------------------------------------------------------------------------------------|
| PubMed                                                                                       |                                                                                                                                                                                                                                                                                                                                                             |
| Concept 1: Food Insecurity                                                                   | ("food insecurity"[tiab] OR "food security"[tiab] OR "food hardship"[tiab] OR "food insufficiency"[tiab] OR hunger[tiab] OR "food stress"[tiab] OR "food assistance"[tiab] OR "social determinants of health"[tiab] OR "basic needs"[tiab] OR "social needs"[tiab] OR "socioeconomic need"[tiab] OR "socioeconomic needs"[tiab] OR "social need"[tiab]) AND |
| Concept 2: Intervention                                                                      | (intervention[tiab] OR interventions[tiab] OR addressing[tiab] OR provision[tiab] OR linking[tiab] OR incorporating[tiab] OR connecting[tiab] OR program development[tiab] OR referral[tiab] OR implementation[tiab] OR partnership[tiab] OR partner[tiab])                                                                                                 |
| Additional Details                                                                           | AND ("2000/01/01"[PDAT] : "2018/09/01"[PDAT])                                                                                                                                                                                                                                                                                                               |
